# Supplementary material for: Antithrombotic Therapy for Secondary Prevention in Patients with Non-Cardioembolic Stroke or Transient Ischemic Attack: A Systematic Review
Source: MDPI journal article supplement (doi:10.3390/life11050447), 2021-05-15
Supplement: s1 [file s1]

# Antithrombotic Therapy for Secondary Prevention in Patients with Non-Cardioembolic Stroke or Transient Ischemic Attack: A Systematic Review

Dániel Tornyos, Alexandra Bálint, Péter Kupó, Oumaima El Alaoui El Abdallaoui and András Komócsi \*

Department of Interventional Cardiology, Heart Institute, Medical School,  
University of Pécs, Ifjúság útja 13, 7624 Pécs, Hungary; tornyos.daniel@pte.hu (D.T.);  
balint.alexandra@pte.hu (A.B.); kupo.peter@pte.hu (P.K.);  
oumaimaelalaouiabdallaoui@gmail.com (O.E.A.E.A.)

\* Correspondence: komocsi.andras@pte.hu; Tel.: +36-72-536-001; Fax: +36-72-536-387

**Citation:** Tornyos, D.; Bálint, A.; Kupó, P.; El Abdallaoui, O.E.A.; Komócsi, A. Antithrombotic Therapy for Secondary Prevention in Patients with Non-Cardioembolic Stroke or Transient Ischemic Attack: A Systematic Review. *Life* **2021**, *11*, 447. <https://doi.org/10.3390/life11050447>

Academic Editors: Gergely Fehér, Péter Klivényi and Joel Rodriguez-Saldana

Received: 31 March 2021

Accepted: 12 May 2021

Published: 15 May 2021

**Publisher's Note:** MDPI stays neutral with regard to jurisdictional claims in published maps and institutional affiliations.

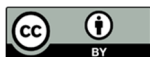

**Copyright:** © 2021 by the authors. Submitted for possible open access publication under the terms and conditions of the Creative Commons Attribution (CC BY) license (<https://creativecommons.org/licenses/by/4.0/>).

**Table S1.** Characteristics of included trials in our systematic review:

| Trial              | Author   | Year | Country | Patient cohort | Treatment                                                                                             | No. of Patients | Follow up           | Primary outcome    | Inclusion criteria                                                                                | Exclusion criteria                                                                                                                                                                                                 |
|--------------------|----------|------|---------|----------------|-------------------------------------------------------------------------------------------------------|-----------------|---------------------|--------------------|---------------------------------------------------------------------------------------------------|--------------------------------------------------------------------------------------------------------------------------------------------------------------------------------------------------------------------|
| <b>Aspirin</b>     |          |      |         |                |                                                                                                       |                 |                     |                    |                                                                                                   |                                                                                                                                                                                                                    |
| <b>AITIA</b>       | Fields   | 1977 | USA     | TIA            | aspirin (1300mg) vs. placebo                                                                          | 88/90           | 6 months            | TIA, stroke, death | <ul style="list-style-type: none"> <li>• TIA within 3 months</li> </ul>                           | <ul style="list-style-type: none"> <li>• bleeding or clotting disorder</li> <li>• history of peptic ulcer</li> <li>• <b>need for continued use of platelet inhibitors or anticoagulants</b></li> </ul>             |
| <b>CCSG</b>        | Barnett  | 1978 | Canada  | TIA            | aspirin (1300mg) vs. placebo vs. sulfinpyrazone (800mg) vs. aspirin (1300mg) + sulfinpyrazone (800mg) | 144/139/156/146 | mean of 26 months   | TIA, stroke, death | <ul style="list-style-type: none"> <li>• TIA within 3 months</li> </ul>                           | <ul style="list-style-type: none"> <li>• coexisting morbid condition explaining their symptoms</li> <li>• likely to die from other illness within 12 months</li> </ul>                                             |
| <b>Danish Coop</b> | Sorensen | 1983 | Denmark | TIA/RIND/AIS   | aspirin (1000mg) vs. placebo                                                                          | 101/102         | median of 25 months | stroke, death      | <ul style="list-style-type: none"> <li>• TIA</li> <li>• RIND</li> <li>• within 1 month</li> </ul> | <ul style="list-style-type: none"> <li>• residual symptoms from a previous stroke</li> <li>• bad physical condition due to other illness</li> <li>• peptic ulcer</li> <li>• referred to carotid surgery</li> </ul> |

|                 |            |      |          |         |                                         |             |                 |               |                                                                                                                                                                                               |                                                                                                                                                                                                                                                                                                                                            |
|-----------------|------------|------|----------|---------|-----------------------------------------|-------------|-----------------|---------------|-----------------------------------------------------------------------------------------------------------------------------------------------------------------------------------------------|--------------------------------------------------------------------------------------------------------------------------------------------------------------------------------------------------------------------------------------------------------------------------------------------------------------------------------------------|
| Swedish<br>Coop | Britton    | 1987 | Sweden   | AIS     | aspirin<br>(1500mg) vs<br>placebo       | 253/252     | 2 years         | stroke, death | <ul style="list-style-type: none"> <li>• ischemic stroke within 1 and 3 weeks</li> </ul>                                                                                                      | <ul style="list-style-type: none"> <li>• atrial fibrillation</li> <li>• recent myocardial infarction</li> <li>• other needs for anticoagulant or antiplatelet drugs               <ul style="list-style-type: none"> <li>• peptic ulcer disease</li> <li>• malignancy</li> <li>• other serious disease</li> </ul> </li> </ul>              |
| UK-TIA          | Farrell    | 1991 | UK       | TIA/AIS | aspirin<br>(300mg-1200mg) vs<br>placebo | 1621/814    | mean of 4 years | MACCE         | <ul style="list-style-type: none"> <li>• TIA, minor ischemic stroke within 3 months</li> <li>• patients were included with cardiac sources of embolism who were not anticoagulated</li> </ul> | <ul style="list-style-type: none"> <li>• history of previous disabling major stroke due to something other than arterial thromboembolism</li> <li>• renal failure</li> <li>• peptic ulcer</li> <li>• abnormal bleeding               <ul style="list-style-type: none"> <li>• myocardial infarction within 3 months</li> </ul> </li> </ul> |
| IST             | Sandercock | 1997 | Multiple | AIS     | aspirin<br>(300mg) vs.<br>placebo       | 9719/9714   | 14 days         | death         | <ul style="list-style-type: none"> <li>• ischemic stroke within 48 hours</li> </ul>                                                                                                           | <ul style="list-style-type: none"> <li>• intracranial hemorrhage</li> <li>• gastrointestinal bleeding</li> <li>• already on long-term anticoagulants</li> </ul>                                                                                                                                                                            |
| CAST            | Chen       | 1997 | China    | AIS     | aspirin<br>(160mg) vs.<br>placebo       | 10335/10320 | 4 weeks         | death         | <ul style="list-style-type: none"> <li>• ischemic stroke within 48 hours</li> </ul>                                                                                                           | <ul style="list-style-type: none"> <li>• gastric bleeding               <ul style="list-style-type: none"> <li>• major life-threatening disease</li> </ul> </li> <li>• severe pre-existing disability</li> </ul>                                                                                                                           |

|             |       |      |        |         |                              |         |                           |               |                                                                                                                                                                                                                                                                                                                                                                                                                                                                                                                             |
|-------------|-------|------|--------|---------|------------------------------|---------|---------------------------|---------------|-----------------------------------------------------------------------------------------------------------------------------------------------------------------------------------------------------------------------------------------------------------------------------------------------------------------------------------------------------------------------------------------------------------------------------------------------------------------------------------------------------------------------------|
| SALT        | Elwin | 1991 | Sweden | TIA/AIS | aspirin (75mg)<br>vs placebo | 676/684 | median<br>of 32<br>months | stroke, death | <ul style="list-style-type: none"> <li>• <b>cardiac source of emboli</b> <ul style="list-style-type: none"> <li>• previous or planned carotid surgery</li> </ul> </li> <li>• other causes of the symptoms established (arteritis, dissection, migraine, hematological or hyperviscosity disorders, or orthostatically induced symptoms only) <ul style="list-style-type: none"> <li>• other severe disorders</li> </ul> </li> <li>• <b>need for long-term treatment with anticoagulant or antiplatelet drugs</b></li> </ul> |
|             |       |      |        |         |                              |         |                           |               | <ul style="list-style-type: none"> <li>• <b>minor ischemic stroke</b> <ul style="list-style-type: none"> <li>• TIA</li> <li>• within 3 months</li> </ul> </li> </ul>                                                                                                                                                                                                                                                                                                                                                        |
| Ticlopidine |       |      |        |         |                              |         |                           |               |                                                                                                                                                                                                                                                                                                                                                                                                                                                                                                                             |

|        |          |      |       |         |                                                              |         |                       |       |                                                                                                                                   |                                                                                                                                                                                                                                                                                                                                                                                                                                                                         |
|--------|----------|------|-------|---------|--------------------------------------------------------------|---------|-----------------------|-------|-----------------------------------------------------------------------------------------------------------------------------------|-------------------------------------------------------------------------------------------------------------------------------------------------------------------------------------------------------------------------------------------------------------------------------------------------------------------------------------------------------------------------------------------------------------------------------------------------------------------------|
| AAASPS | Gorelick | 2003 | USA   | AIS     | ticlopidine (500mg) vs. aspirin (650mg)                      | 902/907 | average of 1.54 years | MACCE | <ul style="list-style-type: none"> <li>ischemic stroke within 7 days and 90 days</li> </ul>                                       | <ul style="list-style-type: none"> <li>TIA</li> <li>subarachnoid hemorrhage</li> <li><b>cardioembolic source</b></li> <li>iatrogenic stroke</li> <li>postoperative stroke</li> <li>carotid endarterectomy</li> <li>hematologic abnormality</li> <li>bleeding diathesis</li> <li>active bleeding</li> <li>severe comorbid condition</li> <li>dementia other neuro degenerative disease</li> <li>thrombocytopenia, neutropenia</li> <li>liver or renal failure</li> </ul> |
|        |          |      |       |         |                                                              |         |                       |       | <ul style="list-style-type: none"> <li>ischemic stroke within 1 and 6 months</li> <li>TIA within the previous 3 months</li> </ul> | <ul style="list-style-type: none"> <li>history of cerebral hemorrhage</li> <li><b>cardiogenic cerebral infarction</b></li> <li>severe hepatic or renal dysfunction</li> <li>bleeding tendency</li> </ul>                                                                                                                                                                                                                                                                |
| TOPALS | Ito      | 2003 | Japan | TIA/AIS | ticlopidine (200mg) vs. ticlopidine (100mg) + aspirin (81mg) | 138/132 | average of 1.59 years | MACCE |                                                                                                                                   |                                                                                                                                                                                                                                                                                                                                                                                                                                                                         |

|                    |      |      |               |         |                                          |           |                   |               |                                                                                                             |                                                                                                                                                                                                                                                                                     |
|--------------------|------|------|---------------|---------|------------------------------------------|-----------|-------------------|---------------|-------------------------------------------------------------------------------------------------------------|-------------------------------------------------------------------------------------------------------------------------------------------------------------------------------------------------------------------------------------------------------------------------------------|
| <b>CATS</b>        | Gent | 1989 | North America | AIS     | ticlopidine (500mg) vs placebo           | 525/528   | mean of 24 months | MACCE         | <ul style="list-style-type: none"> <li>ischemic stroke within 1 week and 4 months</li> </ul>                | <ul style="list-style-type: none"> <li><b>cardioembolic cause</b></li> <li>remain bedridden</li> <li>severe comorbidity</li> <li>required long-term treatment with anticoagulants or antiplatelet drugs</li> </ul>                                                                  |
| <b>TASS</b>        | Hass | 1989 | North America | TIA/AIS | ticlopidine (500mg) vs. aspirin (1300mg) | 1529/1540 | 1192±460 days     | death, stroke | <ul style="list-style-type: none"> <li>TIA</li> <li><b>minor ischemic stroke</b> within 3 months</li> </ul> | <ul style="list-style-type: none"> <li><b>cardiogenic source</b></li> <li>hematologic disorder</li> <li>history of peptic ulcer</li> <li>gastrointestinal bleeding</li> <li>life threatening disease</li> <li><b>need for continued use of aspirin or anticoagulants</b></li> </ul> |
| <b>Clopidogrel</b> |      |      |               |         |                                          |           |                   |               |                                                                                                             |                                                                                                                                                                                                                                                                                     |

| Study  | Author | Year | Design   | Population | Intervention                           | Control | Sample Size | Duration           | Primary Outcome | Secondary Outcomes                                                                                                                                                                                                                                                                                                                                                                                                                                                                                                                                                                                                   | Notes |
|--------|--------|------|----------|------------|----------------------------------------|---------|-------------|--------------------|-----------------|----------------------------------------------------------------------------------------------------------------------------------------------------------------------------------------------------------------------------------------------------------------------------------------------------------------------------------------------------------------------------------------------------------------------------------------------------------------------------------------------------------------------------------------------------------------------------------------------------------------------|-------|
| CAPRIE | Gent   | 1996 | Multiple | AIS        | clopidogrel (75mg) vs. aspirin (325mg) |         | 3233/3198   | mean of 1.91 years | MACCE           | <ul style="list-style-type: none"> <li>ischemic stroke within 1 week and 6 months</li> <li>carotid endarterectomy</li> <li>intracerebral, intracranial hemorrhage</li> <li>severe cerebral deficit</li> <li>severe co-morbidity</li> <li>scheduled for major surgery</li> <li>severe renal or hepatic insufficiency</li> <li>hemostatic disorder or systemic bleeding</li> <li>thrombocytopenia or neutropenia</li> <li>history of drug-induced hematologic or hepatic abnormalities</li> <li>abnormal WBC, differential, or platelet count</li> <li>anticipated requirement for long-term anticoagulants</li> </ul> |       |

|               |       |     |                                           |         |          |                                                                                                                          |                                                                                                          |                                                                                                                                                                                                                                                                                                                                                                                                                                           |
|---------------|-------|-----|-------------------------------------------|---------|----------|--------------------------------------------------------------------------------------------------------------------------|----------------------------------------------------------------------------------------------------------|-------------------------------------------------------------------------------------------------------------------------------------------------------------------------------------------------------------------------------------------------------------------------------------------------------------------------------------------------------------------------------------------------------------------------------------------|
| Fukuuchi 2007 | Japan | AIS | clopidogrel (75mg) vs ticlopidine (200mg) | 573/578 | 52 weeks | safety: hematologic changes, hepatic dysfunction, nontraumatic hemorrhage, serious adverse drug reactions<br>sec.: MACCE | <ul style="list-style-type: none"> <li>ischemic stroke from 8 days with no maximum time limit</li> </ul> | <ul style="list-style-type: none"> <li>cardioembolic source</li> <li>bleeding disorders</li> <li>risk of bleeding</li> <li>history of intracranial hemorrhage</li> <li>current diabetic retinopathy</li> <li>severe renal or heart disease</li> <li>uncontrolled hypertension</li> </ul>                                                                                                                                                  |
| Uchiyama 2009 | Japan | AIS | clopidogrel (75mg) vs ticlopidine (200mg) | 939/923 | 52 weeks | safety: hematologic changes, hepatic dysfunction, and atraumatic serious hemorrhage<br>sec.: MACCE                       | <ul style="list-style-type: none"> <li>ischemic stroke from 8 days with no maximum time limit</li> </ul> | <ul style="list-style-type: none"> <li>cardiac sources of embolism</li> <li>TIA after the recent stroke               <ul style="list-style-type: none"> <li>serious impairment</li> </ul> </li> <li>bleeding disorders</li> <li>history of intracranial hemorrhage</li> <li>severe renal</li> <li>heart disease</li> <li>uncontrolled hypertension</li> <li>hepatic dysfunction</li> <li>thrombocytopenia</li> <li>leukopenia</li> </ul> |



|            |       |      |          |     |                                                              |             |                   |        |                                                                                                                                                                                                                                                                                                                                                                          |
|------------|-------|------|----------|-----|--------------------------------------------------------------|-------------|-------------------|--------|--------------------------------------------------------------------------------------------------------------------------------------------------------------------------------------------------------------------------------------------------------------------------------------------------------------------------------------------------------------------------|
|            |       |      |          |     |                                                              |             |                   |        | <ul style="list-style-type: none"> <li>• hemorrhagic stroke</li> <li>• brain tumor</li> <li>• stroke induced by a surgical or cardiovascular procedure such as carotid endarterectomy, angiogram or cardiac surgery</li> <li>• active peptic ulcer <ul style="list-style-type: none"> <li>• history of a hemostatic disorder or systemic bleeding</li> </ul> </li> </ul> |
| PROFESS    | Sacco | 2008 | Multiple | AIS | aspirin (50mg) + dipyridamole (400mg) vs. clopidogrel (75mg) | 10181/10151 | mean of 2.5 years | stroke | <ul style="list-style-type: none"> <li>• ischemic stroke within 90 days</li> </ul>                                                                                                                                                                                                                                                                                       |
| Cilostazol |       |      |          |     |                                                              |             |                   |        |                                                                                                                                                                                                                                                                                                                                                                          |
| CSPS       | Gotoh | 2000 | Japan    | AIS | cilostazol (200mg) vs. placebo                               | 526/526     | mean of 3.2 years | stroke | <ul style="list-style-type: none"> <li>• ischemic stroke within 1 and 6 months</li> <li>• intracranial hemorrhage</li> <li>• <b>cardioembolic source</b></li> <li>• hemostatic disorders</li> <li>• systemic bleeding</li> <li>• malignant tumor</li> <li>• liver cirrhosis</li> <li>• renal failure</li> <li>• heart failure</li> <li>• bedridden</li> </ul>            |
| CASISP     | Huang | 2008 | China    | AIS | aspirin (100mg) vs. cilostazol (200mg)                       | 359/360     | 1.5 years         | stroke | <ul style="list-style-type: none"> <li>• ischemic stroke within 1 and 6 months</li> <li>• history of intracranial or subarachnoid hemorrhage</li> <li>• <b>cardiogenic embolism</b></li> <li>• severe disability</li> <li>• uncontrolled severe comorbidities</li> </ul>                                                                                                 |

|            |                |       |      |                                       |                                        |                   |                     |                                                                                                                                                                                                              |                                                                                                                                                                                                                                                                                                                                                                                                                                                                        |
|------------|----------------|-------|------|---------------------------------------|----------------------------------------|-------------------|---------------------|--------------------------------------------------------------------------------------------------------------------------------------------------------------------------------------------------------------|------------------------------------------------------------------------------------------------------------------------------------------------------------------------------------------------------------------------------------------------------------------------------------------------------------------------------------------------------------------------------------------------------------------------------------------------------------------------|
| CSPS2      | Shinohara 2010 | Japan | AIS  | cilostazol (200mg) vs. aspirin (81mg) | 1337/1335                              | mean of 29 months | stroke              | <ul style="list-style-type: none"><li>ischemic stroke within 26 weeks</li></ul>                                                                                                                              | <ul style="list-style-type: none"><li>cardioembolic source</li><li>increased risk of hemorrhage</li><li>congestive heart failure</li></ul>                                                                                                                                                                                                                                                                                                                             |
|            |                |       |      |                                       |                                        |                   |                     | <ul style="list-style-type: none"><li>peptic ulcer</li><li>blood, hepatic, or renal disorders</li><li>undergone or scheduled to undergo percutaneous transluminal angioplasty or revascularization</li></ul> |                                                                                                                                                                                                                                                                                                                                                                                                                                                                        |
| PICASSO    | Kim            | 2018  | Asia | TIA/AIS                               | cilostazol (200mg) vs. aspirin (100mg) | 755/757           | median of 1.9 years | MACCE                                                                                                                                                                                                        | <ul style="list-style-type: none"><li>ischemic stroke or TIA with a history of imaging findings of intracerebral hemorrhage or two or more microbleeds within 180 days</li><li>cerebral hemorrhage within 6 months before study entry</li><li>cardioembolic source<ul style="list-style-type: none"><li>severe cardiomyopathy</li></ul></li><li>congestive heart failure<ul style="list-style-type: none"><li>myocardial infarction within 4 weeks</li></ul></li></ul> |
| Ticagrelor |                |       |      |                                       |                                        |                   |                     |                                                                                                                                                                                                              |                                                                                                                                                                                                                                                                                                                                                                                                                                                                        |

|                        |           |      |          |              |                                                    |           |           |               |                                                                                                                |                                                                                                                                                                                                                                              |
|------------------------|-----------|------|----------|--------------|----------------------------------------------------|-----------|-----------|---------------|----------------------------------------------------------------------------------------------------------------|----------------------------------------------------------------------------------------------------------------------------------------------------------------------------------------------------------------------------------------------|
| SOCRATES               | Johnston  | 2016 | Multiple | TIA/AIS      | ticagrelor (180mg) vs. aspirin (100mg)             | 6589/6610 | 90 days   | MACCE         | <ul style="list-style-type: none"><li>• non-severe ischemic stroke</li></ul>                                   | <ul style="list-style-type: none"><li>• atrial fibrillation</li><li>• ventricular aneurysm</li><li>• cardioembolic cause</li><li>• thrombolysis, thrombectomy</li></ul>                                                                      |
|                        |           |      |          |              |                                                    |           |           |               | <ul style="list-style-type: none"><li>• TIA within 24 hours</li></ul>                                          | <ul style="list-style-type: none"><li>• bleeding diathesis</li><li>• coagulation disorder</li><li>• history of intracerebral hemorrhage</li><li>• gastrointestinal bleeding within 6 months</li><li>• major surgery within 30 days</li></ul> |
| Aspirin + Dipyridamole |           |      |          |              |                                                    |           |           |               |                                                                                                                |                                                                                                                                                                                                                                              |
|                        | Acheson   | 1969 | UK       | TIA/AIS      | dipyridamole (400mg->800mg) vs. placebo            | 85/84     | 25 months | stroke, death | <ul style="list-style-type: none"><li>• ischemic stroke</li><li>• TIA within 5 years</li></ul>                 | <ul style="list-style-type: none"><li>• NA</li></ul>                                                                                                                                                                                         |
| ESPS                   | Lowenthal | 1990 | Multiple | TIA/RIND/AIS | aspirin (990mg) + dipyridamole (225mg) vs. placebo | 1250/1250 | 2 years   | stroke, death | <ul style="list-style-type: none"><li>• TIA</li><li>• RIND</li><li>• ischemic stroke within 3 months</li></ul> | <ul style="list-style-type: none"><li>• life-threatening associated disease such as uncontrolled hypertension or diabetes</li><li>• bleeding diathesis</li><li>• peptic ulcer</li></ul>                                                      |

|        |          |      |               |         |                                                                                               |                     |                     |               |                                                                                                               |                                                                                                                                                                                                                                                                                                                              |
|--------|----------|------|---------------|---------|-----------------------------------------------------------------------------------------------|---------------------|---------------------|---------------|---------------------------------------------------------------------------------------------------------------|------------------------------------------------------------------------------------------------------------------------------------------------------------------------------------------------------------------------------------------------------------------------------------------------------------------------------|
| ESPS 2 | Diener   | 1996 | Multiple      | TIA/AIS | aspirin (50mg) vs. dipyridamole (400mg) vs. aspirin (50mg) + dipyridamole (400mg) vs. placebo | 1649/1654/1650/1649 | 2 years             | stroke, death | <ul style="list-style-type: none"> <li>• TIA</li> <li>• ischemic stroke</li> <li>• within 3 months</li> </ul> | <ul style="list-style-type: none"> <li>• gastrointestinal bleeding</li> <li>• bleeding disturbances</li> <li>• <b>any condition requiring continued use of ASA or anticoagulants</b></li> <li>• life-threatening condition</li> </ul>                                                                                        |
| AICLA  | Boussier | 1983 | France        | TIA/AIS | placebo vs. aspirin (1000mg) vs aspirin (1000mg) + dipyridamole (225mg)                       | 204/198/202         | 3 years             | stroke        | <ul style="list-style-type: none"> <li>• TIA</li> <li>• ischemic stroke</li> <li>• within 1 year</li> </ul>   | <ul style="list-style-type: none"> <li>• <b>atrial fibrillation</b></li> <li>• <b>cardiac valvular disease</b></li> <li>• polycythemia</li> <li>• thrombocythemia</li> <li>• estrogen treatment</li> <li>• hemodynamic factors</li> <li>• peptic ulcer</li> <li>• ICA or vertebral artery stenosis</li> </ul>                |
| ACCSG  | Fields   | 1985 | North America | TIA     | dipyridamole (300mg) + aspirin (1300mg) vs. aspirin (1300mg)                                  | 448/442             | median of 25 months | stroke, death | <ul style="list-style-type: none"> <li>• TIA</li> <li>• within 3 months</li> </ul>                            | <ul style="list-style-type: none"> <li>• serious concurrent illnesses</li> <li>• take anticoagulants or other drugs that influenced platelet function</li> <li>• carotid endarterectomy</li> <li>• <b>cardiac source for embolism</b></li> <li>• history of peptic ulcer</li> <li>• bleeding or clotting disorder</li> </ul> |

|        |          |      |          |         |                                                                   |           |                     |                       |                                                                                                                            |                                                                                                                                                                                                                                                                                                                                                                                                                                                                                                                                                                                                                                                                                                                                          |
|--------|----------|------|----------|---------|-------------------------------------------------------------------|-----------|---------------------|-----------------------|----------------------------------------------------------------------------------------------------------------------------|------------------------------------------------------------------------------------------------------------------------------------------------------------------------------------------------------------------------------------------------------------------------------------------------------------------------------------------------------------------------------------------------------------------------------------------------------------------------------------------------------------------------------------------------------------------------------------------------------------------------------------------------------------------------------------------------------------------------------------------|
| ESPRIT | Halkes   | 2006 | Multiple | TIA/AIS | aspirin (30-325 mg) + dipyridamole (400mg) vs. aspirin (30-325mg) | 1363/1376 | mean of 3.5 years   | MACCE, major bleeding | <ul style="list-style-type: none"> <li>• TIA</li> <li>• <b>minor ischemic stroke</b></li> <li>• within 6 months</li> </ul> | <ul style="list-style-type: none"> <li>• <b>cardiac source of embolism</b></li> <li>• recent myocardial infarction</li> <li>• carotid stenosis for which carotid endarterectomy or endovascular treatment was planned</li> <li>• blood coagulation disorder <ul style="list-style-type: none"> <li>• limited life expectancy</li> </ul> </li> </ul>                                                                                                                                                                                                                                                                                                                                                                                      |
| JASAP  | Uchiyama | 2011 | Japan    | AIS     | dipyridamole (400mg) + aspirin (50mg) vs. aspirin (81mg)          | 652/639   | mean of 15.6 months | stroke                | <ul style="list-style-type: none"> <li>• ischemic stroke</li> <li>• within 1 week and 6 months</li> </ul>                  | <ul style="list-style-type: none"> <li>• diagnosis of brain disorders with a bleeding risk <ul style="list-style-type: none"> <li>• <b>cardiogenic sources of embolism</b> <ul style="list-style-type: none"> <li>• acute coronary syndromes &lt; 6 months</li> <li>• history of peptic ulcer &lt; 3 years</li> </ul> </li> </ul> </li> <li>• having undergone arterial reconstruction after developing ischemic stroke <ul style="list-style-type: none"> <li>• severe disability <ul style="list-style-type: none"> <li>• bleeding or bleeding tendencies</li> </ul> </li> <li>• serious cardiac, renal or hepatic disorders</li> <li>• malignant tumor or having received cancer treatment in the past 5 years</li> </ul> </li> </ul> |

| Aspirin + Clopidogrel    |           |      |          |         |                                                                |           |                     |        |                                                                                                    |                                                                                                                                                                                                                                                                                                                   |
|--------------------------|-----------|------|----------|---------|----------------------------------------------------------------|-----------|---------------------|--------|----------------------------------------------------------------------------------------------------|-------------------------------------------------------------------------------------------------------------------------------------------------------------------------------------------------------------------------------------------------------------------------------------------------------------------|
| <b>MATCH</b>             | Diener    | 2004 | Multiple | TIA/AIS | aspirin (75mg) + clopidogrel (75mg) vs. clopidogrel (75mg)     | 3797/3802 | 18 months           | MACCE  | <ul style="list-style-type: none"> <li>• ischemic stroke</li> <li>• TIA within 3 months</li> </ul> | <ul style="list-style-type: none"> <li>• severe comorbid conditions</li> <li>• hepatic insufficiency</li> <li>• peptic ulceration</li> <li>• history of systemic bleeding</li> <li>• bleeding diathesis</li> <li>• coagulopathy</li> <li>• scheduled for major surgery or vascular surgery</li> </ul>             |
| <b>CHARISMA substudy</b> | Hankey    | 2011 | Multiple | TIA/AIS | clopidogrel (75mg) + aspirin (75-162mg) vs. aspirin (75-162mg) | 2157/2163 | median of 25 months | stroke | <ul style="list-style-type: none"> <li>• ischemic stroke</li> <li>• TIA within 5 years</li> </ul>  | <ul style="list-style-type: none"> <li>• taking oral antithrombotic medications or nonsteroidal anti-inflammatory drugs on a long-term basis</li> </ul>                                                                                                                                                           |
| <b>SPS3</b>              | Benavente | 2012 | Multiple | TIA/AIS | aspirin (325mg) vs. aspirin (325mg) + clopidogrel (75mg)       | 1503/1517 | mean of 3.4 years   | stroke | <ul style="list-style-type: none"> <li>• symptomatic lacunar stroke within 180 days</li> </ul>     | <ul style="list-style-type: none"> <li>• remote cortical infarct</li> <li>• large subcortical infarct</li> <li>• history of intracerebral, intracranial hemorrhage</li> <li>• disabling stroke</li> <li>• surgically amenable ipsilateral carotid artery disease</li> <li>• <b>cardioembolic cause</b></li> </ul> |

|               |         |      |               |         |                                                        |           |         |        |                                                                                                                            |                                                                                                                                                                                                                                                                                                  |
|---------------|---------|------|---------------|---------|--------------------------------------------------------|-----------|---------|--------|----------------------------------------------------------------------------------------------------------------------------|--------------------------------------------------------------------------------------------------------------------------------------------------------------------------------------------------------------------------------------------------------------------------------------------------|
| <b>FASTER</b> | Kennedy | 2007 | North America | TIA/AIS | clopidogrel (75mg) + aspirin (81mg) vs. aspirin (81mg) | 198/194   | 90 days | stroke | <ul style="list-style-type: none"> <li>• TIA</li> <li>• <b>minor ischemic stroke</b></li> <li>• within 24 hours</li> </ul> | <ul style="list-style-type: none"> <li>• intracranial hemorrhage</li> <li>• thrombolysis, thrombectomy</li> <li>• <b>cardiac source</b></li> <li>• acute coronary syndrome</li> <li>• secondary to a procedure</li> <li>• limited life expectancy</li> </ul>                                     |
| <b>CHANCE</b> | Wang    | 2015 | China         | TIA/AIS | clopidogrel (75mg) + aspirin (75mg) vs. aspirin (75mg) | 2584/2586 | 1 year  | stroke | <ul style="list-style-type: none"> <li>• <b>minor ischemic stroke</b></li> <li>• TIA</li> <li>• within 24 hours</li> </ul> | <ul style="list-style-type: none"> <li>• hemorrhage</li> <li>• vascular malformation</li> <li>• tumor, abscess</li> <li>• other major nonischemic brain disease</li> <li>• <b>cardiac sources of embolism</b></li> <li>• clear indication for anticoagulation</li> <li>• thrombolysis</li> </ul> |

|        |      |       |         |                                                          |         |         |        |                                                                                                                            |                                                                                                                                                                                                                                                                                                            |
|--------|------|-------|---------|----------------------------------------------------------|---------|---------|--------|----------------------------------------------------------------------------------------------------------------------------|------------------------------------------------------------------------------------------------------------------------------------------------------------------------------------------------------------------------------------------------------------------------------------------------------------|
|        |      |       |         |                                                          |         |         |        |                                                                                                                            | <ul style="list-style-type: none"> <li>• <b>cardioembolic source</b></li> <li>• thrombocytopenia</li> <li>• anticoagulation therapy before stroke onset</li> <li>• definite indication for anticoagulation</li> </ul>                                                                                      |
| Fan He | 2014 | China | TIA/AIS | clopidogrel (75mg) + aspirin (100mg) vs. aspirin (300mg) | 321/326 | 14 days | stroke | <ul style="list-style-type: none"> <li>• TIA</li> <li>• <b>minor ischemic stroke</b></li> <li>• within 72 hours</li> </ul> | <ul style="list-style-type: none"> <li>• current peptic ulceration</li> <li>• history of systemic bleeding</li> <li>• coagulopathy</li> <li>• major surgery or trauma in the previous 3 months</li> <li>• terminal malignancy</li> <li>• serious renal or liver disease</li> <li>• thrombolysis</li> </ul> |



| POINT | Author   | Year | Country  | Population | Intervention                                                   | Control   | Duration | Primary Outcome | Secondary Outcome                                                                                    | Exclusion Criteria                                                                                                                                                                                                                                                                                                                                                                                                                                                |
|-------|----------|------|----------|------------|----------------------------------------------------------------|-----------|----------|-----------------|------------------------------------------------------------------------------------------------------|-------------------------------------------------------------------------------------------------------------------------------------------------------------------------------------------------------------------------------------------------------------------------------------------------------------------------------------------------------------------------------------------------------------------------------------------------------------------|
|       | Yi       | 2014 | China    | AIS        | clopidogrel (75mg) + aspirin (200mg) vs. aspirin (200mg)       | 284/286   | 30 days  | MACCE           | <ul style="list-style-type: none"> <li>ischemic stroke within 48 hours</li> </ul>                    | <ul style="list-style-type: none"> <li>history of carotid endarterectomy or carotid stent therapy</li> <li>clinically relevant arrhythmia</li> <li>atrial fibrillation</li> <li>liver, renal failure</li> <li>severe cardiovascular disease</li> <li>malignancies</li> <li>thrombocytopenia</li> <li>anemia</li> <li>major surgical procedure within 1 week</li> <li>history of myeloproliferative disorders</li> <li>heparin-induced thrombocytopenia</li> </ul> |
|       | Johnston | 2018 | Multiple | TIA/AIS    | clopidogrel (75mg) + aspirin (50-325mg) vs. aspirin (50-325mg) | 2432/2449 | 90 days  | MACCE           | <ul style="list-style-type: none"> <li>TIA</li> <li>minor ischemic stroke within 12 hours</li> </ul> | <ul style="list-style-type: none"> <li>thrombolysis</li> <li>endovascular therapy or endarterectomy</li> <li>atrial fibrillation</li> <li>cardiovascular disease in whom anticoagulation would be indicated</li> </ul>                                                                                                                                                                                                                                            |

|                |          |      |          |         |                                                                               |           |         |                  |                                                                                                                  |                                                                                                                                                                                                                                                                                                                                                                                                                                                                                             |
|----------------|----------|------|----------|---------|-------------------------------------------------------------------------------|-----------|---------|------------------|------------------------------------------------------------------------------------------------------------------|---------------------------------------------------------------------------------------------------------------------------------------------------------------------------------------------------------------------------------------------------------------------------------------------------------------------------------------------------------------------------------------------------------------------------------------------------------------------------------------------|
| PRINCE         | Wang     | 2019 | China    | TIA/AIS | ticagrelor (180mg) + aspirin (100mg) vs. clopidogrel (75mg) + aspirin (100mg) | 336/339   | 90 days | HPR sec.: stroke | <ul style="list-style-type: none"><li>• minor ischemic stroke</li><li>• TIA within 24 hours</li></ul>            | <ul style="list-style-type: none"><li>• intracranial hemorrhage</li><li>• acute coronary syndrome</li><li>• other pathology that could account for the neurological symptoms</li></ul>                                                                                                                                                                                                                                                                                                      |
| THALES         | Johnston | 2020 | Multiple | TIA/AIS | ticagrelor (180mg) + aspirin (75-100mg) vs. aspirin (75-100mg)                | 5523/5493 | 30 days | stroke, death    | <ul style="list-style-type: none"><li>• mild-to-moderate ischemic stroke</li><li>• TIA within 24 hours</li></ul> | <ul style="list-style-type: none"><li>• atrial fibrillation</li><li>• ventricular aneurysm</li><li>• cardioembolic cause<ul style="list-style-type: none"><li>• carotid endarterectomy</li></ul></li><li>• thrombolysis, thrombectomy</li><li>• bleeding diathesis<ul style="list-style-type: none"><li>• coagulation disorder</li><li>• history of intracerebral hemorrhage</li></ul></li><li>• gastrointestinal bleeding within 6 months</li><li>• major surgery within 30 days</li></ul> |
| Sulfinpyrazone |          |      |          |         |                                                                               |           |         |                  |                                                                                                                  |                                                                                                                                                                                                                                                                                                                                                                                                                                                                                             |



|              |          |      |          |         |                                       |         |         |       |                                                                                                                                        |                                                                                                                                                                                                                                                                                                                                                                                                                                                                                                                                                                       |
|--------------|----------|------|----------|---------|---------------------------------------|---------|---------|-------|----------------------------------------------------------------------------------------------------------------------------------------|-----------------------------------------------------------------------------------------------------------------------------------------------------------------------------------------------------------------------------------------------------------------------------------------------------------------------------------------------------------------------------------------------------------------------------------------------------------------------------------------------------------------------------------------------------------------------|
| TAPIRSS      | Culebras | 2004 | Multiple | TIA/AIS | triflusal (600mg) vs. aspirin (325mg) | 213/216 | 2 years | MACCE | <ul style="list-style-type: none"> <li>• TIA</li> <li>• <b>minor ischemic stroke</b></li> <li>• within 15 days and 6 months</li> </ul> | <ul style="list-style-type: none"> <li>• disabling stroke</li> <li>• brain hemorrhage</li> <li>• stroke of non-atherothrombotic cause</li> <li>• <b>cardioembolic source of stroke</b></li> <li>• previous carotid endarterectomy</li> <li>• cognitive impairment</li> <li>• renal or liver failure</li> <li>• moderate or severe heart failure</li> <li>• HIV infection</li> <li>• alcohol or drug abuse</li> <li>• active peptic ulcer</li> <li>• need for long-term anticoagulant, or antiplatelet agents</li> <li>• malignancy with high bleeding risk</li> </ul> |
| Sarpogrelate |          |      |          |         |                                       |         |         |       |                                                                                                                                        |                                                                                                                                                                                                                                                                                                                                                                                                                                                                                                                                                                       |

|          |                |       |     |                                         |                              |                    |                 |                                                                                                       |                                                                                                                                                                                                                                                                                                                                                                                                                                                                                                                                                                                            |
|----------|----------------|-------|-----|-----------------------------------------|------------------------------|--------------------|-----------------|-------------------------------------------------------------------------------------------------------|--------------------------------------------------------------------------------------------------------------------------------------------------------------------------------------------------------------------------------------------------------------------------------------------------------------------------------------------------------------------------------------------------------------------------------------------------------------------------------------------------------------------------------------------------------------------------------------------|
| S-ACCESS | Shinohara 2008 | Japan | AIS | sarpogrelate (100mg) vs. aspirin (81mg) | 747/752                      | mean of 1.59 years | stroke          | <ul style="list-style-type: none"><li>ischemic stroke within 6 months</li></ul>                       | <ul style="list-style-type: none"><li>cardioembolic stroke</li><li>mRS score of 4 or more<ul style="list-style-type: none"><li>previous or scheduled vascular surgery for cerebral infarction</li><li>history of intracranial hemorrhage</li></ul></li><li>systemic bleeding<ul style="list-style-type: none"><li>peptic ulcer</li><li>history of bleeding diathesis or coagulopathy<ul style="list-style-type: none"><li>severe complications such as cardiac, renal, hepatic, and blood disorders</li></ul></li><li>treatment for malignancy within the past 5 years</li></ul></li></ul> |
|          |                |       |     |                                         |                              |                    |                 |                                                                                                       |                                                                                                                                                                                                                                                                                                                                                                                                                                                                                                                                                                                            |
| Warfarin |                |       |     |                                         |                              |                    |                 |                                                                                                       |                                                                                                                                                                                                                                                                                                                                                                                                                                                                                                                                                                                            |
| WARSS    | Mohr           | 2001  | USA | AIS                                     | warfarin vs. aspirin (325mg) | 1103/1103          | 2 years±1 month | ischemic stroke, death <ul style="list-style-type: none"><li>ischemic stroke within 30 days</li></ul> | <ul style="list-style-type: none"><li>due to a procedure</li><li>carotid stenosis for which surgery was planned</li><li>cardioembolic source</li></ul>                                                                                                                                                                                                                                                                                                                                                                                                                                     |

|               |               |               |         |                                       |           |                     |                                    |                                                                                                            |                                                                                                                                                                                                                                                                                                                                                                                                                                        |
|---------------|---------------|---------------|---------|---------------------------------------|-----------|---------------------|------------------------------------|------------------------------------------------------------------------------------------------------------|----------------------------------------------------------------------------------------------------------------------------------------------------------------------------------------------------------------------------------------------------------------------------------------------------------------------------------------------------------------------------------------------------------------------------------------|
| WASID         | Chimowitz2005 | North America | TIA/AIS | aspirin (325-1300mg) vs warfarin      | 280/289   | mean of 1.8 years   | stroke, brain hemorrhage, CV death | <ul style="list-style-type: none"><li>• TIA</li><li>• <b>nondisabling stroke</b> within 90 days</li></ul>  | <ul style="list-style-type: none"><li>• 50 to 99 percent stenosis of the extracranial carotid artery</li><li>• non-atherosclerotic stenosis of an intracranial artery</li><li>• <b>cardiac source of embolism (e.g., atrial fibrillation)</b></li></ul>                                                                                                                                                                                |
| Rivaroxaban   |               |               |         |                                       |           |                     |                                    |                                                                                                            |                                                                                                                                                                                                                                                                                                                                                                                                                                        |
| NAVIGATE ESUS | Hart          | 2018 Multiple | AIS     | rivaroxaban (15mg) vs aspirin (100mg) | 3609/3604 | median of 11 months | stroke, bleeding                   | <ul style="list-style-type: none"><li>• <b>minor ischemic stroke</b> between 7 days and 6 months</li></ul> | <ul style="list-style-type: none"><li>• extracranial vessel atherosclerosis causing more than 50% luminal stenosis</li><li>• <b>cardiac source of embolism</b></li><li>• severely disabling stroke<ul style="list-style-type: none"><li>• indication for anticoagulation or for antiplatelet therapy</li><li>• major bleeding within the previous 6 months</li><li>• previous nontraumatic intracranial hemorrhage</li></ul></li></ul> |
| Dabigatran    |               |               |         |                                       |           |                     |                                    |                                                                                                            |                                                                                                                                                                                                                                                                                                                                                                                                                                        |

|                  |        |      |          |     |                                                     |           |                           |                     |                                                                                                                                                           |                                                                                                                                                                                                                                                                        |
|------------------|--------|------|----------|-----|-----------------------------------------------------|-----------|---------------------------|---------------------|-----------------------------------------------------------------------------------------------------------------------------------------------------------|------------------------------------------------------------------------------------------------------------------------------------------------------------------------------------------------------------------------------------------------------------------------|
| RE-SPECT<br>ESUS | Diener | 2019 | Multiple | AIS | dabigatran<br>(220-300mg)<br>vs. aspirin<br>(100mg) | 2695/2695 | median<br>of 19<br>months | stroke,<br>bleeding | <ul style="list-style-type: none"> <li>• <b>cardioembolic source</b></li> <li>• intracerebral hemorrhage</li> <li>• increased risk of bleeding</li> </ul> | <ul style="list-style-type: none"> <li>• mRS score of <math>\geq 4</math> at the time of randomization</li> <li>• other specific stroke etiology (e.g., cerebral arteritis or arterial dissection, migraine/vasospasm, drug abuse)</li> <li>• renal failure</li> </ul> |
|                  |        |      |          |     |                                                     |           |                           |                     | <ul style="list-style-type: none"> <li>• <b>minor ischemic stroke</b></li> <li>• within 3 months</li> </ul>                                               |                                                                                                                                                                                                                                                                        |

**Abbreviations:** AIS: acute ischemic event, ASA: aspirin, CV: cardiovascular, HPR: high platelet reactivity, ICA: internal carotid artery, MACCE: major adverse cardiac and cerebrovascular events, MES: microembolic signals, MRI: magnetic resonance imaging, mRS: modified Rankin Scale, NA: not applicable, RIND: reversible ischemic neurological deficit, TIA: transient ischemic attack, WBC: white blood count.

**cardiogenic source:** mitral valve stenosis, prosthetic valve, endocarditis, valvular vegetations, myocardial infarction within 6 weeks, ventricular aneurysm intraventricular or intraatrial blood clots, mitral valve prolapse, atrial fibrillation, sick sinus syndrome, idiopathic cardiomyopathy, atrial myxoma or other cardiac tumors.

**Table S2.** Clinical characteristics of the included patient populations:

| Acronym<br>year<br>author          | Blinding        | Patient<br>cohort | Lenght<br>of<br>treatmen<br>t period | No.<br>sample<br>size | No. (%)<br>female sex | Mean<br>age<br>(years) | No. (%)<br>prior<br>TIA | No. (%)<br>prior<br>stroke | No. (%)<br>hypertension | No. (%)<br>PAD | No. (%)<br>prior<br>MI | No. (%)<br>DM | No. (%)<br>dyslipidaemi<br>a |
|------------------------------------|-----------------|-------------------|--------------------------------------|-----------------------|-----------------------|------------------------|-------------------------|----------------------------|-------------------------|----------------|------------------------|---------------|------------------------------|
| Aspirin                            |                 |                   |                                      |                       |                       |                        |                         |                            |                         |                |                        |               |                              |
| AITIA<br>1977<br>Fields            | double<br>blind | TIA               | 6 months                             | 178                   | 60 (34)               | NA                     | NA                      | 16 (9)                     | 84 (47)                 | 16 (9)         | 33 (18)                | 25 (14)       | NA                           |
| CCSG<br>1978<br>Barnett            | double<br>blind | TIA               | mean of<br>26<br>months              | 585                   | 179 (31)              | NA                     | NA                      | NA                         | NA                      | NA             | NA                     | NA            | NA                           |
| Danish<br>Coop<br>1983<br>Sorensen | double<br>blind | TIA/RI<br>ND/AIS  | median<br>of 25<br>months            | 203                   | 55 (27)               | 59                     | NA                      | 11 (5)                     | 55 (27)                 | 30 (15)        | 18 (8)                 | NA            | 59 (29)                      |
| Swedish<br>Coop<br>1987<br>Britton | double<br>blind | AIS               | 2 years                              | 505                   | 192 (38)              | 68                     | 40 (8)                  | 55 (11)                    | 232 (46)                | 45 (9)         | 50 (10)                | 86 (17)       | 10 (2)                       |
| UK-TIA<br>1991<br>Farrell          | double<br>blind | TIA/AIS           | mean of 4<br>years                   | 2435                  | 656 (27)              | 60                     | NA                      | 81 (3)                     | 955 (39)                | 298 (12)       | 242 (10)               | 106 (4)       | 856 (35)                     |
| IST<br>1997<br>Sandercock          | open<br>label   | AIS               | 14 days                              | 19433                 | NA                    | NA                     | NA                      | NA                         | NA                      | NA             | NA                     | NA            | NA                           |
| CAST<br>1997<br>Chen               | double<br>blind | AIS               | 4 weeks                              | 21106                 | 7739 (37)             | 63                     | NA                      | NA                         | NA                      | NA             | NA                     | NA            | NA                           |
| SALT<br>1991<br>Elwin              | double<br>blind | TIA/AIS           | mean of<br>30 and 27<br>months       | 1360                  | 470 (34)              | 67                     | 128 (9)                 | 124 (9)                    | 632 (46)                | 111 (8)        | 149 (11)               | 175 (13)      | NA                           |
| Ticlopidine                        |                 |                   |                                      |                       |                       |                        |                         |                            |                         |                |                        |               |                              |



|                                     |                 |         |                             |       |           |    |           |           |            |          |          |           |             |
|-------------------------------------|-----------------|---------|-----------------------------|-------|-----------|----|-----------|-----------|------------|----------|----------|-----------|-------------|
| <b>AAASPS<br/>2003<br/>Gorelick</b> | double<br>blind | AIS     | average<br>of 1.54<br>years | 1809  | 967 (53)  | 61 | NA        | NA        | 1539 (85)  | NA       | 170 (9)  | 738 (41)  | 697 (38)    |
| <b>TOPALS<br/>2003<br/>Ito</b>      | open<br>label   | TIA/AIS | average<br>of 1.59<br>years | 270   | 95 (35)   | 67 | NA        | NA        | 128 (47)   | NA       | NA       | 61 (23)   | 27 (10)     |
| <b>CATS<br/>1989<br/>Gent</b>       | double<br>blind | AIS     | mean of<br>18<br>months     | 1053  | 406 (38)  | 65 | 183 (17)  | 821 (78)  | 710 (67)   | 110 (10) | 179 (17) | 331 (31)  | NA          |
| <b>TASS<br/>1989<br/>Hass</b>       | double<br>blind | TIA/AIS | 818±592<br>days             | 3069  | 1082 (35) | 63 | NA        | 295 (10)  | 1204 (39)  | 447 (14) | 514 (17) | 597 (19)  | 1122 (36)   |
| <b>Clopidogrel</b>                  |                 |         |                             |       |           |    |           |           |            |          |          |           |             |
| <b>CAPRIE<br/>1996<br/>Gent</b>     | double<br>blind | AIS     | mean of<br>1.63 year        | 6431  | 2346 (36) | 65 | 1221 (19) | 1157 (18) | 4179 (65)  | NA       | 772 (12) | 1639 (25) | 2411 (0.37) |
| <b>2007<br/>Fukuuchi</b>            | double<br>blind | AIS     | 52 weeks                    | 1151  | 311 (27)  | 64 | NA        | NA        | 780 (68)   | NA       | NA       | 434 (38)  | 222 (19)    |
| <b>2009<br/>Uchiyama</b>            | double<br>blind | AIS     | 26 -52<br>weeks             | 1862  | 529 (28)  | 64 | NA        | NA        | 1304 (70)  | NA       | NA       | 410 (22)  | 661 (35)    |
| <b>PROFESS<br/>2008<br/>Sacco</b>   | double<br>blind | AIS     | 1.5-4.4<br>years            | 20332 | 7319 (36) | 66 | 1769 (8)  | 3709 (18) | 15045 (74) | 609 (3)  | 1362 (7) | 5743 (28) | 9474 (46)   |
| <b>Cilostazol</b>                   |                 |         |                             |       |           |    |           |           |            |          |          |           |             |
| <b>CSPS<br/>2000<br/>Gotoh</b>      | double<br>blind | AIS     | 663±461<br>days             | 1052  | 684 (65)  | 65 | NA        | NA        | 636 (60)   | NA       | NA       | 258 (25)  | 252 (24)    |
| <b>CASISP<br/>2008<br/>Huang</b>    | double<br>blind | AIS     | 12-18<br>months             | 719   | 225 (31)  | 60 | NA        | NA        | 569 (79)   | NA       | NA       | 131 (18)  | 211 (29)    |
| <b>PICASSO<br/>2018<br/>Kim</b>     | double<br>blind | AIS     | median<br>of 1.9<br>years   | 1512  | 575 (38)  | 65 | NA        | NA        | 1347 (89)  | NA       | NA       | 485 (32)  | 661 (44)    |
| <b>CSPS2<br/>2010<br/>Shinohara</b> | double<br>blind | AIS     | 1-5 years                   | 2672  | 756 (28)  | 63 | NA        | NA        | 1967 (74)  | NA       | NA       | 775 (29)  | 1159 (43)   |

|                                            |                                                          |                  |                           |       |           |    |           |           |           |              |          |           |           |
|--------------------------------------------|----------------------------------------------------------|------------------|---------------------------|-------|-----------|----|-----------|-----------|-----------|--------------|----------|-----------|-----------|
| <b>Ticagrelor</b>                          |                                                          |                  |                           |       |           |    |           |           |           |              |          |           |           |
| <b>SOCRAT<br/>ES<br/>2016<br/>Johnston</b> | double<br>blind                                          | TIA/AIS          | 3 months                  | 13199 | 5483 (42) | 66 | 856 (6)   | 1593 (12) | 9730 (74) | NA           | 548 (4)  | 3212 (24) | 5028 (38) |
| <b>Aspirin + Dipyridamole</b>              |                                                          |                  |                           |       |           |    |           |           |           |              |          |           |           |
| <b>1969<br/>Acheson</b>                    | double<br>blind                                          | TIA/AIS          | 25<br>months              | 169   | 52 (31)   | 58 | NA        | NA        | 97 (57)   | NA           | NA       | NA        | NA        |
| <b>ESPS<br/>1990<br/>Lowenthal</b>         | double<br>blind                                          | TIA/RI<br>ND/AIS | 2 years                   | 2500  | 1050 (42) | 63 | NA        | NA        | 916 (36)  | NA           | NA       | NA        | NA        |
| <b>ESPS 2<br/>1996<br/>Diener</b>          | double<br>blind                                          | TIA/AIS          | 2 years                   | 6602  | 2774 (42) | 67 | NA        | NA        | 3997 (60) | 1454<br>(22) | NA       | 1011 (15) | 1509 (23) |
| <b>AICLA<br/>1983<br/>Bousser</b>          | double<br>blind                                          | TIA/AIS          | 3 years                   | 604   | 181 (30)  | 63 | NA        | NA        | 380 (63)  | 42 (7)       | 42 (7)   | 132 (22)  | 157 (26)  |
| <b>ACCSG<br/>1985<br/>Fields</b>           | double<br>blind                                          | TIA              | median<br>of 25<br>months | 890   | 294 (33)  | 63 | NA        | 116 (13)  | 423 (48)  | 69 (8)       | 134 (15) | 132 (15)  | NA        |
| <b>ESPRIT<br/>2006<br/>Halkes</b>          | open<br>label<br>treatment<br>/ blinded<br>endpoint<br>s | TIA/AIS          | mean of<br>3.5 years      | 2739  | 950 (35)  | 63 | NA        | 314 (11)  | 1631 (59) | 128 (5)      | 184 (7)  | 512 (19)  | 1272 (46) |
| <b>JASAP<br/>2011<br/>Uchiyama</b>         | double<br>blind                                          | AIS              | 447-471<br>days           | 1294  | 369 (28)  | 66 | NA        | NA        | 1143 (88) | NA           | NA       | 523 (40)  | 856 (66)  |
| <b>Aspirin + Clopidogrel</b>               |                                                          |                  |                           |       |           |    |           |           |           |              |          |           |           |
| <b>MATCH<br/>2004<br/>Diener</b>           | double<br>blind                                          | TIA/AIS          | 18<br>months              | 7599  | 2821 (37) | 66 | 1442 (19) | 1981 (26) | 5945 (78) | 776 (10)     | 363 (5)  | 5197 (68) | 4280 (56) |

|                                               |                                             |         |                      |       |           |    |           |           |           |         |        |           |          |
|-----------------------------------------------|---------------------------------------------|---------|----------------------|-------|-----------|----|-----------|-----------|-----------|---------|--------|-----------|----------|
| <b>CHARISMA</b><br>substudy<br>2011<br>Hankey | double blind                                | TIA/AIS | median of 25 months  | 4320  | 1576 (36) | 64 | 1410 (32) | 3332 (77) | 3295 (76) | 259 (6) | NA     | 1253 (29) | NA       |
| <b>SPS3</b><br>2012<br>Benavente              | double blind                                | TIA/AIS | mean of 3.4 years    | 3020  | 1117 (37) | 63 | 452 (15)  |           | 2264 (75) | NA      | NA     | 1102 (36) | NA       |
| <b>FASTER</b><br>2007<br>Kennedy              | double blind                                | TIA/AIS | 90 days              | 392   | 185 (47)  | 68 | 63 (16)   | 29 (7)    | 198 (50)  | 8 (2)   | 19 (4) | 42 (10)   | 28 (7)   |
| <b>CHANCE</b><br>2015<br>Wang                 | double blind                                | TIA/AIS | 90 days              | 5170  | 1750 (34) | 62 | 174 (3)   | 1033 (20) | 3399 (66) | NA      | 96 (2) | 1093 (21) | 573 (11) |
| <b>2014</b><br>Fan He                         | open label                                  | TIA/AIS | 14 days              | 647   | 279 (43)  | 62 | 221 (34)  |           | 437 (67)  | NA      | NA     | 266 (41)  | NA       |
| <b>2014</b><br>Yi                             | open label                                  | AIS     | 30 days              | 570   | 257 (45)  | 70 | NA        | NA        | 414 (73)  | NA      | 7 (1)  | 215 (38)  | NA       |
| <b>POINT</b><br>2018<br>Johnston              | double blind                                | TIA/AIS | 90 days              | 4881  | 2195 (45) | 65 | NA        | NA        | 3373 (69) | NA      | NA     | 1340 (27) | NA       |
| <b>Aspirin + Ticagrelor</b>                   |                                             |         |                      |       |           |    |           |           |           |         |        |           |          |
| <b>PRINCE</b><br>2019<br>Wang                 | open label<br>treatment / blinded endpoints | TIA/AIS | 3 months             | 675   | 181 (27)  | 61 | 18 (3)    | 121 (18)  | 411 (61)  | NA      | NA     | 164 (24)  | 41 (6)   |
| <b>THALES</b><br>2020<br>Johnston             | double blind                                | TIA/AIS | 30 days              | 11016 | 4279 (39) | 65 | 515 (5)   | 1815 (17) | 8520 (77) | NA      | NA     | 3142 (29) | NA       |
| <b>Sulfapyrazone</b>                          |                                             |         |                      |       |           |    |           |           |           |         |        |           |          |
| <b>ATIAIS</b><br>1982<br>Candelise            | double blind                                | TIA     | mean of 11.23 months | 124   | 38 (31)   | 54 | NA        | NA        | 58 (47)   | 11 (9)  | NA     | 9 (7)     | 56 (45)  |

|                                    |              |         |                     |      |           |    |         |           |           |        |         |           |           |
|------------------------------------|--------------|---------|---------------------|------|-----------|----|---------|-----------|-----------|--------|---------|-----------|-----------|
| Pentoxifylline                     |              |         |                     |      |           |    |         |           |           |        |         |           |           |
| 1981<br>Herskovits                 | open label   | TIA     | 1 year              | 66   | 16 (24)   | 60 | NA      | NA        | 39 (59)   | NA     | NA      | 11 (16)   | 48 (72)   |
| Triflusal                          |              |         |                     |      |           |    |         |           |           |        |         |           |           |
| TAPIRSS<br>2004<br>Culebras        | double blind | TIA/AIS | mean of 586 days    | 429  | 136 (32)  | 65 | 67 (16) | 55 (13)   | 303 (71)  | 15 (3) | 24 (5)  | 78 (18)   | 160 (37)  |
| Sarpogrelate                       |              |         |                     |      |           |    |         |           |           |        |         |           |           |
| S-<br>ACCESS<br>2008<br>Shinohara  | double blind | AIS     | mean of 580 days    | 1499 | 423 (28)  | 65 | NA      | 200 (13)  | 1037 (69) | NA     | NA      | 419 (28)  | 593 (39)  |
| Warfarin                           |              |         |                     |      |           |    |         |           |           |        |         |           |           |
| WARSS<br>2001<br>Mohr              | double blind | AIS     | 2 years±1 months    | 2206 | 897 (41)  | 63 |         | 629 (29)  | 1499 (68) | NA     | NA      | 705 (32)  | NA        |
| WASID<br>2005<br>Chimowitz         | double blind | TIA/AIS | mean of 1.8 years   | 569  | 219 (38)  | 64 | NA      | 138 (24)  | 477 (84)  | NA     | NA      | 216 (38)  | 391 (69)  |
| Rivaroxaban                        |              |         |                     |      |           |    |         |           |           |        |         |           |           |
| NAVIGATE<br>ESUS<br>2018<br>Hart   | double blind | AIS     | median of 11 months | 7213 | 2777 (38) | 67 |         | 1263 (17) | 5585 (77) | NA     | NA      | 1806 (25) | NA        |
| Dabigatran                         |              |         |                     |      |           |    |         |           |           |        |         |           |           |
| RE-SPECT<br>ESUS<br>2019<br>Diener | double blind | AIS     | median of 19 months | 5390 | 1987 (37) | 64 |         | 975 (18)  | 3981 (74) | NA     | 340 (6) | 1224 (23) | 3043 (56) |

**Abbreviations:** AIS: acute ischemic event, DM: diabetes mellitus, MI: myocardial infarction, NA: not applicable, PAD: peripheral artery disease, RIND: reversible ischemic neurological deficit, TIA: transient ischemic attack.

**Table S3.** Summary of the most representative studies comparing antithrombotic medications to aspirin:

| RCT                  | ASA vs.            | Event   | RR                    | P      | Administration time        | Follow up           |
|----------------------|--------------------|---------|-----------------------|--------|----------------------------|---------------------|
| <b>CAST</b>          | Placebo            | IS      | NA                    | 0.01   | within 48 hours            | 4 weeks             |
| <b>TASS</b>          | Ticlopidine        | S       | 0.79 (0.62 – 0.96)    | 0.024  | within 3 months            | mean of 3.26 years  |
| <b>CAPRIE</b>        | Clopidogrel        | S+MI+VD | 0.927 (0.813 – 1.057) | 0.26   | within 1 week and 6 months | mean of 1.91 years  |
| <b>CSPS2</b>         | Cilostazol         | S       | 0.743 (0.564 – 0.981) | 0.0357 | within 26 weeks            | mean of 29 months   |
| <b>SOCRATES</b>      | Ticagrelor         | S       | 0.86 (0.75 – 0.99)    | 0.03   | within 24 hours            | 90 days             |
| <b>ESPS2</b>         | ASA + Dipyridamole | S       | NA                    | 0.006  | within 3 months            | 2 years             |
| <b>POINT</b>         | ASA + Clopidogrel  | S       | 0.74 (0.58 – 0.94)    | 0.01   | within 12 hours            | 90 days             |
| <b>THALES</b>        | ASA + Ticagrelor   | S       | 0.81 (0.69 – 0.95)    | 0.02   | within 24 hours            | 30 days             |
| <b>WASID</b>         | Warfarin           | S       | 1.20 (0.82 – 1.75)    | 0.34   | within 90 days             | mean of 1.8 years   |
| <b>NAVIGATE ESUS</b> | Rivaroxaban        | S       | 1.08 (0.87 – 1.34)    | NA     | within 7 days and 6 months | median of 11 months |
| <b>RE-SPECT ESUS</b> | Dabigatran         | S       | 0.85 (0.69 – 1.03)    | 0.10   | within 3 months            | median of 19 months |

**Abbreviations:** ASA: aspirin, acetylsalicylic acid, IS: ischemic stroke, MI: myocardial infarction, RCT: randomized controlled trial, S: ischemic + hemorrhagic stroke, VD: vascular death.
